# Supplementary material for: Single-Step Synthesized Functionalized Copper Carboxylate Framework Meshes as Hierarchical Catalysts for Enhanced Reduction of Nitrogen-Containing Phenolic Contaminants
Source: MDPI journal article supplement (doi:10.3390/catal12070765), 2022-07-10
Supplement: s1 [file s1]

The Supporting Information  
*for*  
Single-step Synthesized Functionalized  
Copper Carboxylate Framework Meshes  
as Hierarchical Catalysts for Enhanced  
Reduction of Nitrogen-containing Phenolic  
Contaminants

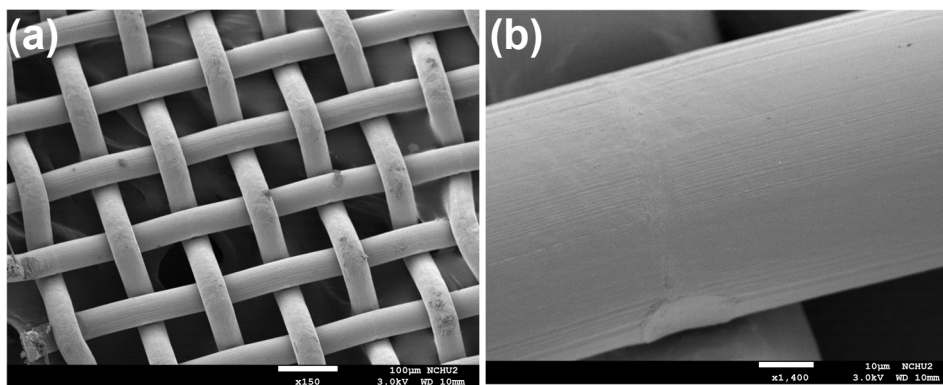

Figure S1 SEM images of the pristine Cu mesh.

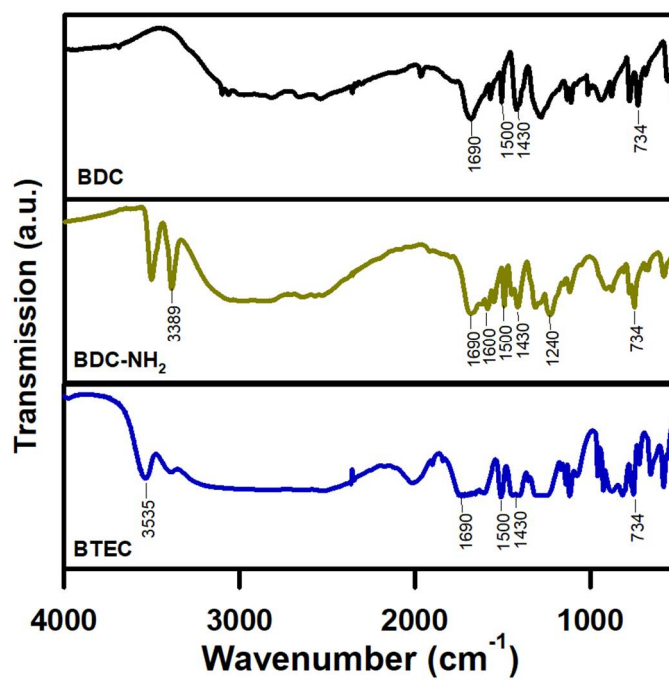

Figure S2. IR analyses of ligands.

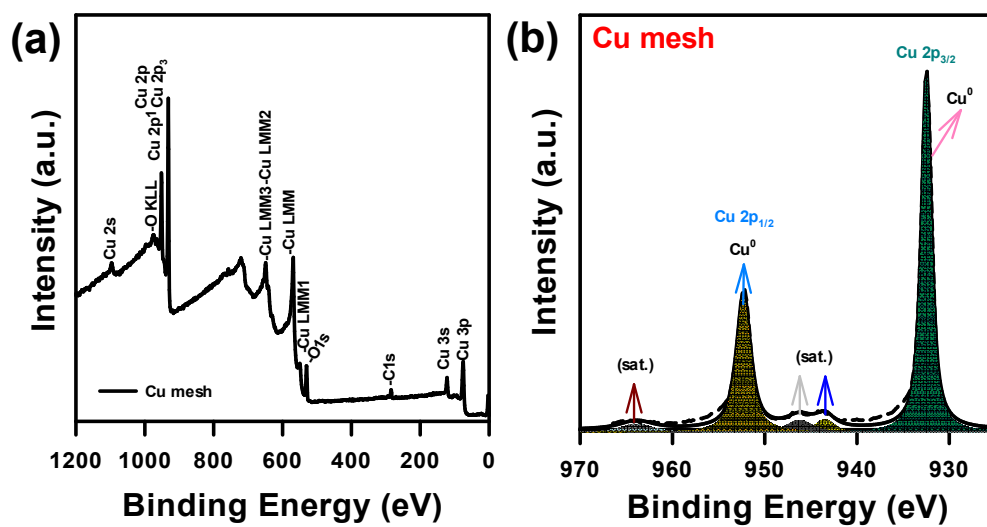

Figure S3. XPS of pristine Cu mesh: (a) full spectrum, and (b) Cu2p.

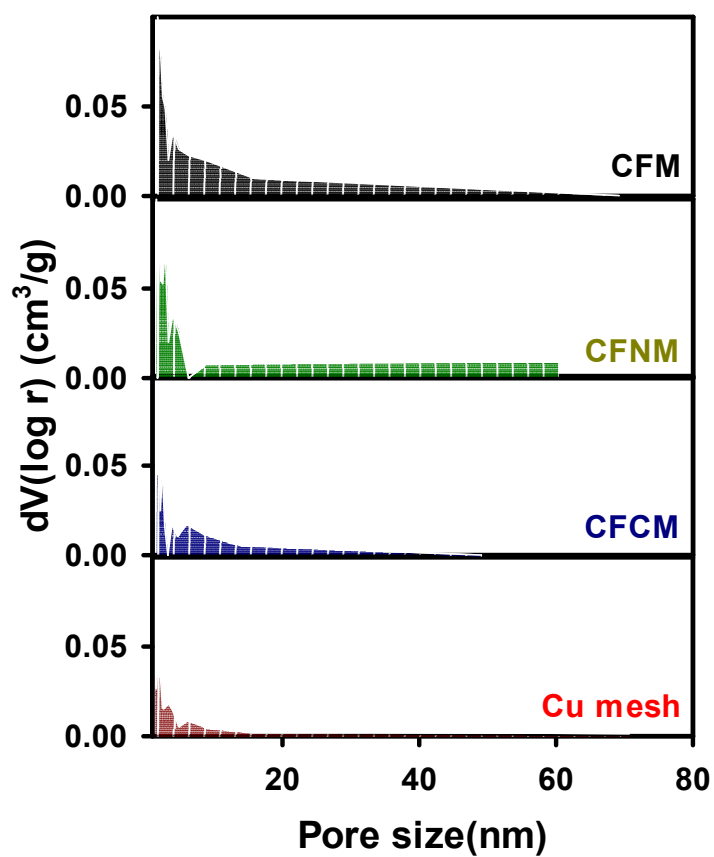

Figure S4. Pore size distributions of CF meshes.

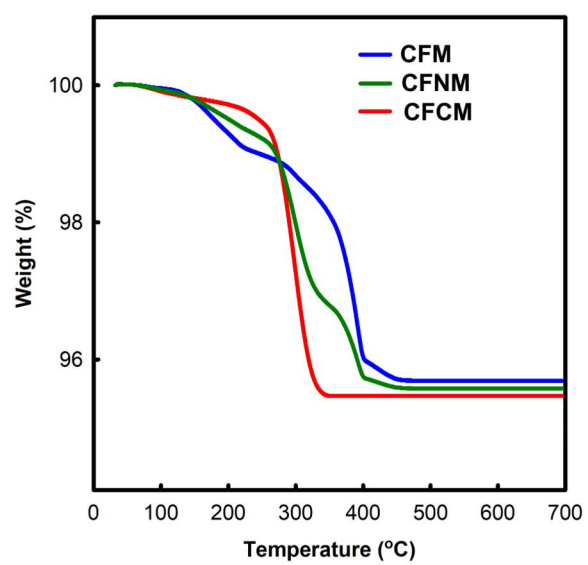

Figure S5. Thermogravimetric analyses of CuCF meshes in N<sub>2</sub>.

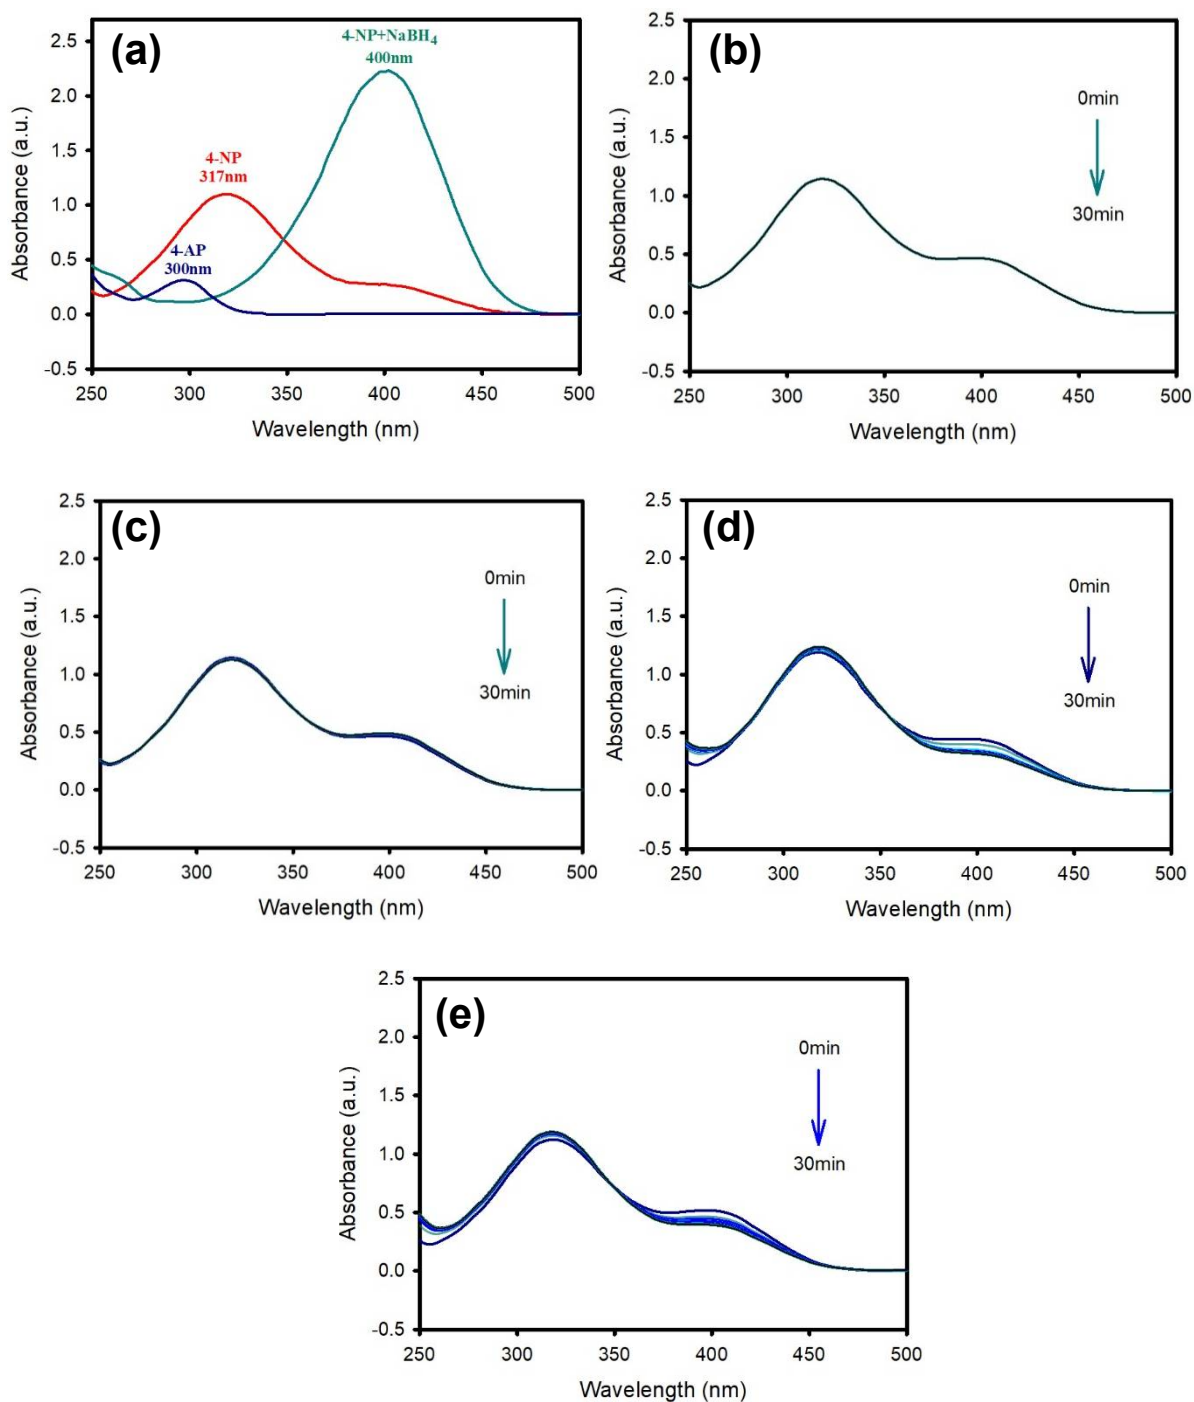

Figure S6. UV-Vis spectra of (a) 4-NP with and without  $\text{NaBH}_4$ , and 4-AP; (b) 4-NP (without  $\text{NaBH}_4$ ) in the presence of pristine Cu mesh, (c) 4-NP (without  $\text{NaBH}_4$ ) in the presence of CFM, (d) 4-NP (without  $\text{NaBH}_4$ ) in the presence of CFNM, (e) 4-NP (without  $\text{NaBH}_4$ ) in the presence of CFCM.

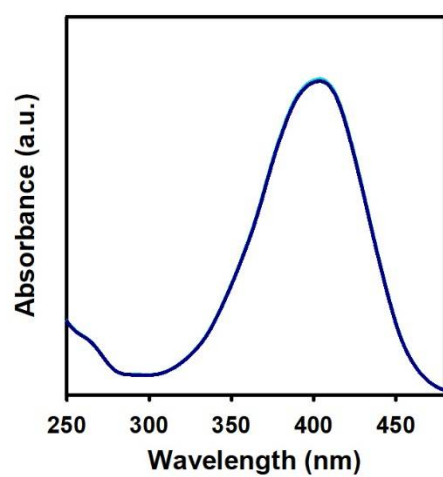

Figure S7. UV-Vis spectra of 4-NP with  $\text{NaBH}_4$  in the presence of pristine Cu mesh.

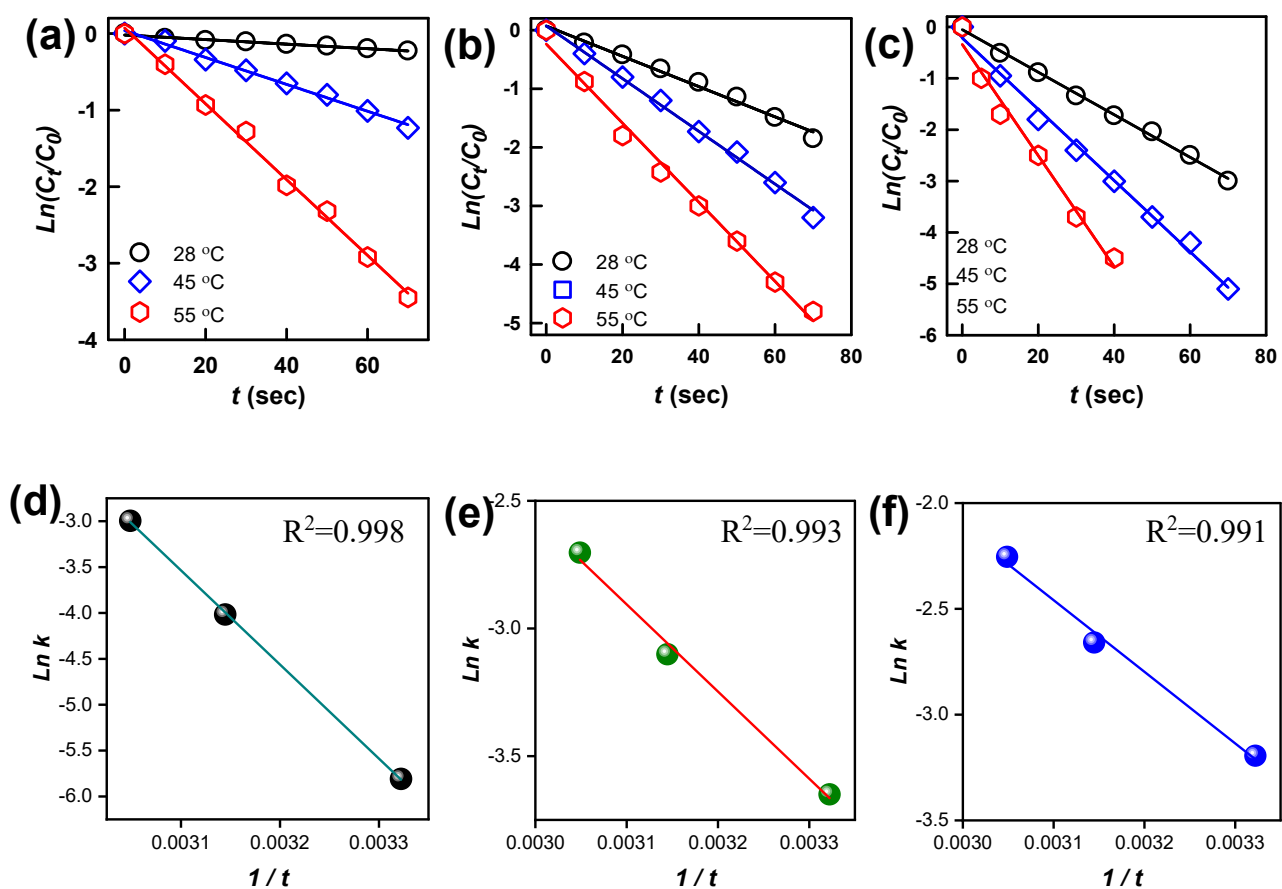

Figure S8. 4-NP reduction plots of  $\ln(C_t/C_0)$  vs  $t$ , and plots of  $\ln k$  vs  $1/t$  of by (a, d) CFM, (b, e) CFNM, and (c, f) CFCM.

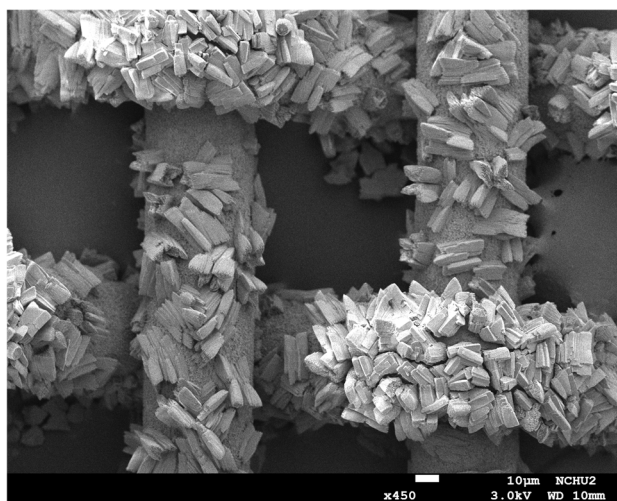

Figure S9. SEM image of the used CFCM.

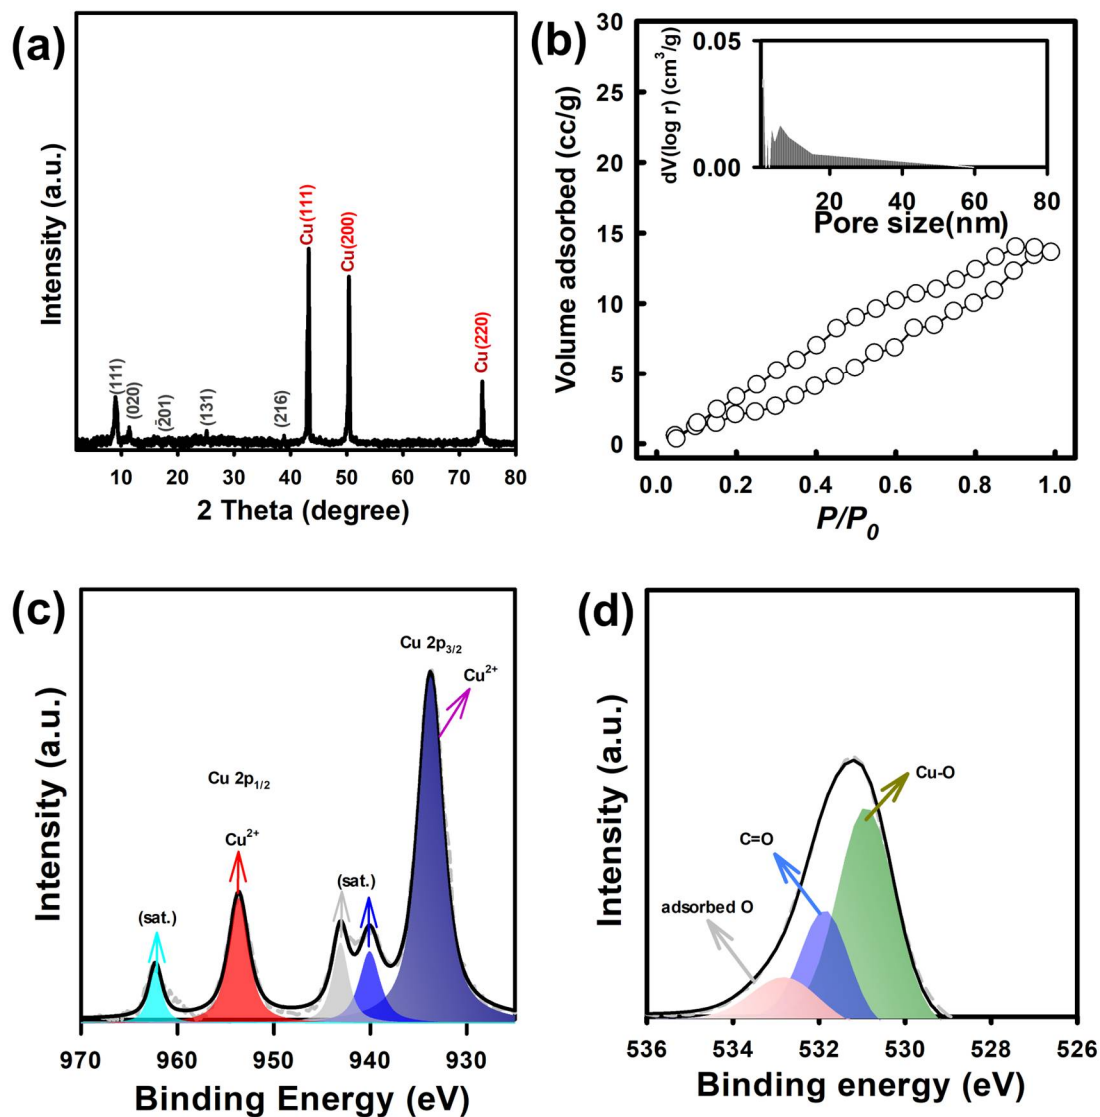

Figure S10. (a) XRD, (b) N<sub>2</sub> sorption isotherm, and XPS analyses of used CFCM: (c) Cu2p, and (d) O1s core-level spectra.



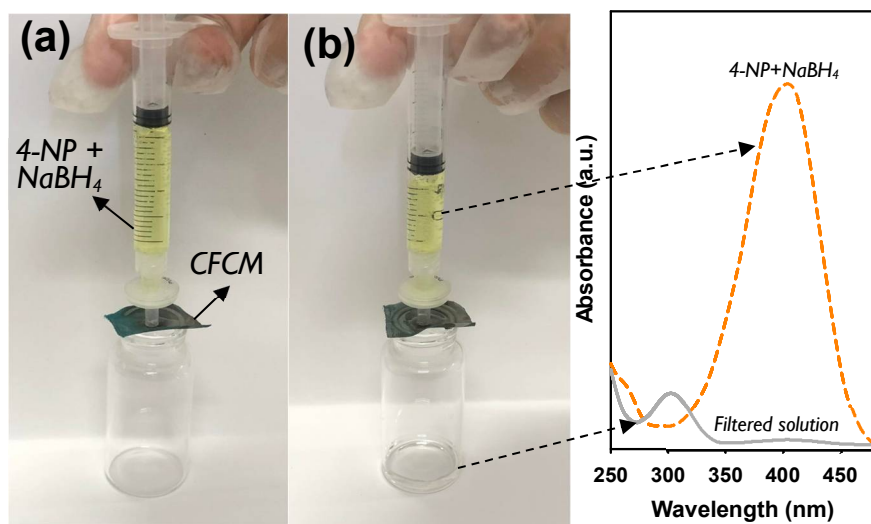

Figure S11. Demonstration of filtration-type 4-NP reduction by CFCM.

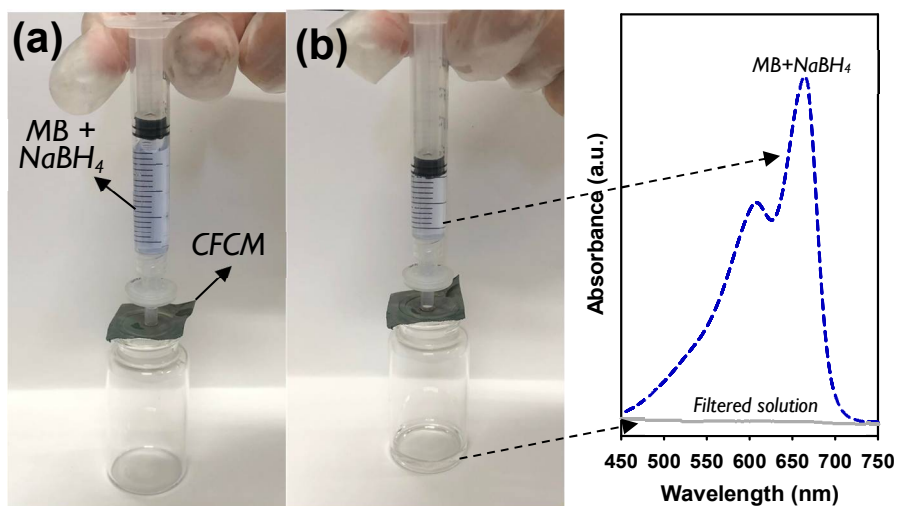

Figure S12. Demonstration of filtration-type MB reduction by CFCM.

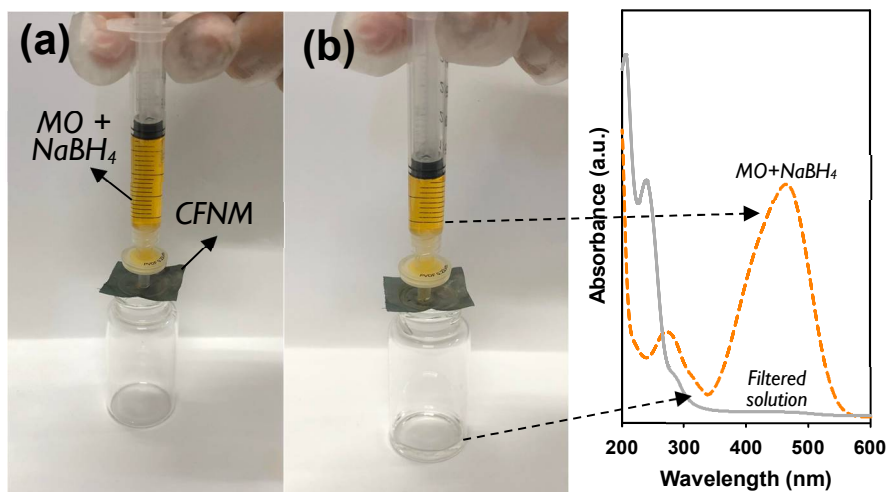

Figure S13. Demonstration of filtration-type MO reduction by CFNM.
